# Supplementary material
Source: PubMed Central journal article supplement (PMC3248690)
Supplement: NIHMS335959-supplement-1.pdf [file NIHMS335959-supplement-1.pdf]

# **SUPPLEMENTAL MATERIAL**

## Supplemental Methods

***Quality Control for Mapping and Variant Calling.*** MAQ was used for calling SNVs and the alignment of paired-end reads, by default, allows for 2 mismatches per read. For each exome sequenced, at least 20000 on-target SNVs are expected. The MAQ filtering criteria for mapped reads was a Phred-like consensus quality greater than 40. Several tolerance parameters are utilized when calling an SNV by MAQ. Listed below are 5 scenarios where an SNV would be discarded based upon the assessment of its location and quality:

- SNVs within 3-bp of a potential INDEL
- SNVs covered by three or fewer reads
- SNVs covered by zero reads with a mapping quality higher than 60
- SNVs with Phred-like consensus quality score less than 40
- If there are 3 or more SNVs within a 10 bp region, all are discarded

BWA alignment was used for calling INDELS and, by default, the alignment of paired-end reads allows for 3 mismatches per read. For each exome sequenced, at least 1000 on-target INDELS are expected. There were no filtering criteria used for these variants. Several tolerance parameters are utilized when calling an INDEL by GATK. Listed below are 3 scenarios where an INDEL would be discarded based upon the assessment of its location and quality:

- Minimum coverage is below 6 (default)
- Fraction of reads supporting the consensus INDEL is below 0.3 (minimum fraction default).
- Out of all of the reads that have an INDEL at a site, any instance where the fraction of those supporting the consensus INDEL is below 0.7 (Minimum consensus fraction default).

**Supplemental Table 1. Summary of Regions Comprised of Contiguous, Homozygous SNVs**

| <b>Pedigree Number</b> | <b>PHENO</b> | <b>CHR</b> | <b>SNV1</b> | <b>SNV2</b> | <b>POS1</b> | <b>POS2</b> | <b>KB</b> | <b>NSNV</b> | <b>DENSITY</b> | <b>PHOM</b> | <b>PHET</b> |
|------------------------|--------------|------------|-------------|-------------|-------------|-------------|-----------|-------------|----------------|-------------|-------------|
| III.12                 | 2            | 7          | rs9648899   | rs13234589  | 76539536    | 93805797    | 17266.26  | 2137        | 8.08           | 0.999       | 0.001       |
| III.10                 | 2            | 7          | rs2906510   | rs13234589  | 77472916    | 93805797    | 16332.88  | 2033        | 8.034          | 0.999       | 0.001       |
| III.6                  | 2            | 7          | rs7789215   | rs13234589  | 77933529    | 93805797    | 15872.27  | 1900        | 8.354          | 0.999       | 0.001       |
| III.4                  | 1            | 7          | rs9648899   | rs4728664   | 76539536    | 86501745    | 9962.209  | 1248        | 7.983          | 0.999       | 0           |
| III.12                 | 2            | 10         | rs4935347   | rs9414948   | 54210789    | 68296132    | 14085.34  | 2126        | 6.625          | 0.998       | 0           |
| III.10                 | 2            | 10         | rs11592723  | rs9414948   | 47164002    | 68296132    | 21132.13  | 2885        | 7.325          | 0.998       | 0           |
| III.1                  | 1            | 10         | rs11592723  | rs10761659  | 47164002    | 64115570    | 16951.57  | 2489        | 6.811          | 0.999       | 0.001       |
| III.4                  | 1            | 10         | rs11592723  | rs9414948   | 47164002    | 68296132    | 21132.13  | 2885        | 7.325          | 0.999       | 0.001       |
| III.12                 | 2            | 14         | rs17278879  | rs8016253   | 43611449    | 45508248    | 1896.799  | 138         | 13.745         | 0.986       | 0.014       |
| III.10                 | 2            | 14         | rs17278879  | rs8016253   | 43611449    | 45508248    | 1896.799  | 138         | 13.745         | 0.986       | 0.014       |
| III.2                  | 1            | 14         | rs17278879  | rs8016253   | 43611449    | 45508248    | 1896.799  | 138         | 13.745         | 0.986       | 0.014       |
| III.4                  | 1            | 14         | rs17278879  | rs8016253   | 43611449    | 45508248    | 1896.799  | 138         | 13.745         | 0.986       | 0.014       |
| III.5                  | 1            | 14         | rs17278879  | rs8016253   | 43611449    | 45508248    | 1896.799  | 138         | 13.745         | 0.986       | 0.014       |
| III.12                 | 2            | 16         | rs4780514   | rs12927233  | 13254572    | 32045466    | 18790.89  | 2244        | 8.374          | 0.999       | 0.001       |
| III.10                 | 2            | 16         | rs4780514   | rs12927233  | 13254572    | 32045466    | 18790.89  | 2244        | 8.374          | 0.999       | 0.001       |
| III.2                  | 1            | 16         | rs4780514   | rs739710    | 13254572    | 18072199    | 4817.627  | 533         | 9.039          | 0.998       | 0.002       |
| III.3                  | 1            | 16         | rs12598321  | rs12927233  | 26066068    | 32045466    | 5979.398  | 904         | 6.614          | 0.997       | 0.001       |
| III.4                  | 1            | 16         | rs4780514   | rs16977003  | 13254572    | 27745273    | 14490.7   | 1683        | 8.61           | 0.998       | 0.001       |
| III.12                 | 2            | 20         | rs6080070   | rs199541    | 15907833    | 19865570    | 3957.737  | 869         | 4.554          | 0.999       | 0.001       |
| III.10                 | 2            | 20         | rs6131996   | rs199541    | 17683508    | 19865570    | 2182.062  | 436         | 5.005          | 1           | 0           |
| III.5                  | 1            | 20         | rs6080070   | rs199541    | 15907833    | 19865570    | 3957.737  | 869         | 4.554          | 0.999       | 0.001       |
| III.12                 | 2            | 20         | rs1409371   | rs6076423   | 24493732    | 26262901    | 1769.169  | 150         | 11.794         | 0.993       | 0.007       |
| III.10                 | 2            | 20         | rs1409371   | rs6076423   | 24493732    | 26262901    | 1769.169  | 150         | 11.794         | 0.993       | 0.007       |
| III.5                  | 1            | 20         | rs1409371   | rs6076423   | 24493732    | 26262901    | 1769.169  | 150         | 11.794         | 0.993       | 0.007       |

PHENO: Phenotype, 1=Unaffected, 2=Affected; CHR, Chromosome; SNV1, SNV (single nucleotide variant) at start of region; SNV2, SNV at end of region; POS1, physical position in base-pairs at start of region; POS2, physical position in base-pairs at end of region; KB, length of region in kilobases; NSNV, number of SNVs in the region; DENSITY, number of SNVs/1 kb in region; PHOM, proportion of calls homozygous for subject in region; PHET, proportion of calls heterozygous for subject in region.

Supplemental Figure 1

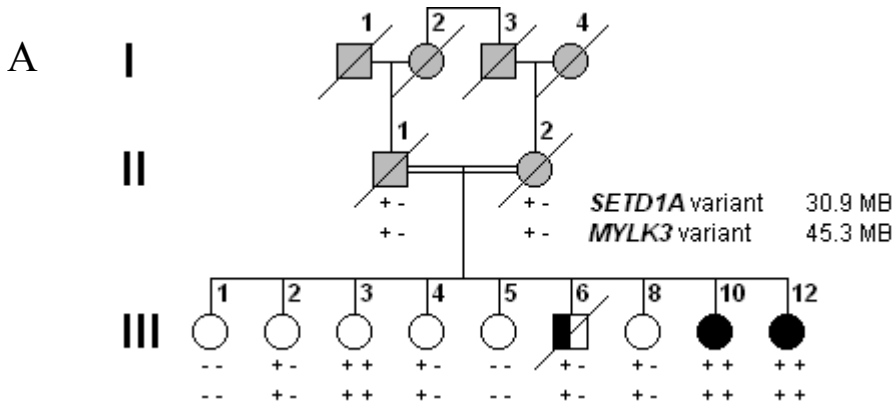

**B**

588 D D R G G S P P P A P T P P Q Q P 604 Human  
 588 . . . . . L . . . . . 604 P596L Substitution  
 588 . . . . . A . . . . . 604 Chimpanzee  
 594 . . . . . . . . . . . . . . . 610 Dog  
 587 . . . . . . . . . . . . . . . 603 Cow  
 601 . . . . . . . . . . . . . . . 617 Mouse

**C**

631 Y I L H L D L K P E N I L C V N Q 647 Human  
 631 . . . . . L . . . . . 647 P639L Substitution  
 615 . . . . . . . . . . . . . . . 631 Chimpanzee  
 828 V . . . . . . . . . . . . . . . 844 Dog  
 594 . . . . . . . . . . . . . . . 610 Cow  
 607 . . . . . . . . . . . S . 623 Mouse  
 598 . . . . . . . . . . . S . 614 Rat  
 729 . . . . . . . . . . . H 745 Chicken  
 382 . . . . . . . . . . . . . . . 398 Platypus  
 584 . . . . . . . . . . . R 600 Frog  
 520 . . . . . . . . . . . S 536 Zebrafish

**Supplemental Figure 1.** (A) In addition to *GATAD1*, exome sequencing revealed homozygosity in two other genes for unreported, nonsynonymous SNVs shared by the affected sisters (III.10 and III.12). On further investigation, all 3 variants were also absent in 23 additional Mayo Clinic exomes and 200 Danish exomes<sup>1</sup> The other variants occurred in *SETD1A* (P596L) and *MYLK3* (P639L), both of which map to the same region of chromosome 16. The individual with idiopathic LVE (III.6) was heterozygous for both variants, raising the possibility of a disease-modifying effect related to mutation dose. However, homozygosity for both variants in an elderly unaffected individual (III.3) ruled these genes out as primary pathogenetic bases of DCM in this family. This individual had a normal echocardiogram and Sestamibi scan at ages 64 and 79, respectively, and had no symptoms of heart failure at age 86. Additionally, 3 siblings (III.2, III.4, and III.8) were heterozygous carriers of both mutations had normal echocardiograms at ages 81, 79, and 55. Conservation of the substituted amino acids in (B) *SETD1A* and (C) *MYLK3* as well as 8 flanking residues is illustrated with the ● symbol indicating a conserved residue. Remarkably, both genes would be plausible candidates for DCM. *MYLK3* is a cardiac specific kinase that plays an integral role in the regulation of sarcomere assembly<sup>2</sup> whereas *SETD1A* is a member of a methyltransferase complex which is known to be involved with the precise histone modification (H3K4Me3) with which *GATAD1* was shown to interact.<sup>3</sup>

## SUPPLEMENTAL REFERENCES

1. Li Y, Vinckenbosch N, Tian G, Huerta-Sanchez E, Jiang T, Jiang H, Albrechtsen A, Andersen G, Cao H, Korneliussen T, Grarup N, Guo Y, Hellman I, Jin X, Li Q, Liu J, Liu X, Sparsø T, Tang M, Wu H, Wu R, Yu C, Zheng H, Astrup A, Bolund L, Holmkvist J, Jørgensen T, Kristiansen K, Schmitz O, Schwartz TW, Zhang X, Li R, Yang H, Wang J, Hansen T, Pedersen O, Nielsen R, Wang J. Resequencing of 200 human exomes identifies an excess of low-frequency non-synonymous coding variants. *Nat Genet.* 2010; 42:969-972.
2. Seguchi O, Takashima S, Yamazaki S, Asakura M, Asano Y, Shintani Y, Wakeno M, Minamino T, Kondo H, Furukawa H, Nakamaru K, Naito A, Takahashi T, Ohtsuka T, Kawakami K, Isomura T, Kitamura S, Tomoike H, Mochizuki N, Kitakaze M. A cardiac myosin light chain kinase regulates sarcomere assembly in the vertebrate heart. *J Clin Invest.* 2007; 117:2812-2824.
3. Tate CM, Lee JH, Skalnik DG. CXXC finger protein 1 restricts the Setd1A histone H3K4 methyltransferase complex to euchromatin. *FEBS J.* 2010; 277:210-223.
